# Supplementary material for: Diagnostic accuracy of teleretinal screening for detection of diabetic retinopathy and age-related macular degeneration: a systematic review and meta-analysis
Source: PubMed Central journal article supplement — BMJ Open Ophthalmol. 2022 Feb 10;7(1):e000915. doi: 10.1136/bmjophth-2021-000915 (PMC8845326; doi:10.1136/bmjophth-2021-000915), 2022-02-10
Supplement: bmjophth-2021-000915supp001.pdf [file bmjophth-2021-000915supp001.pdf]

**Supplementary Table 1.** Detailed search strategy for each of the databases searched.

Database: Ovid MEDLINE(R) and Epub Ahead of Print, In-Process & Other Non-Indexed Citations, Daily and Versions(R) <1946 to July 25, 2021>

Search Strategy:

- 
- 1 diabetic retinopathy/
  - 2 macular edema/
  - 3 diabetic retinopath\*.mp.
  - 4 intraretinal cyst\*.mp.
  - 5 foveal thickness.mp.
  - 6 macular edema.mp.
  - 7 diabetic maculopath\*.mp.
  - 8 macular oedema.mp.
  - 9 central retinal edema.mp.
  - 10 geographic atrophy/
  - 11 wet macular degeneration/
  - 12 age related macul\*.mp.
  - 13 geographic atroph\*.mp.
  - 14 macular degeneration\*.mp.
  - 15 Subretinal Fluid/
  - 16 subretinal fluid.mp.
  - 17 intraretinal fluid\*.mp.
  - 18 Choroidal Neovascularization/
  - 19 Retinal Drusen/
  - 20 retinal drusen.mp.
  - 21 choroidal neovascular\*.mp.
  - 22 exudate\*.mp.
  - 23 (CME or CSME or CMO or CSMO).mp.
  - 24 (DMO or DME).mp.
  - 25 diabetic eye disease\*.mp.
  - 26 or/1-25
  - 27 ehealth.mp.

- 28 Artificial Intelligence.mp.
- 29 AI.mp.
- 30 computer assist\*.mp.
- 31 computer aid\*.mp.
- 32 neural network\*.mp.
- 33 machine learn\*.mp.
- 34 screening.mp.
- 35 exp Artificial Intelligence/  
36 diagnosis, computer-assisted/  
37 image interpretation, computer-assisted/  
38 ((mydriatic or digital or retina\$ or fundus or stereoscopic) adj3 camera).mp.
- 39 ((mydriatic or digital or retina\$ or fundus or stereoscopic) adj3 imag\$).mp.
- 40 (telemedicine\$ or telemonitor\$ or telescreen\$ or telehealth or teleophthalmology).mp.
- 41 technology based.mp.
- 42 remote.mp.
- 43 refer\*.mp.
- 44 smartphone based.mp.
- 45 fundus photography.mp.
- 46 mass screening/  
47 or/27-46  
48 ophthalmoscopy/  
49 biomicroscop\*.mp.
- 50 retinoscopy/  
51 physical examination/  
52 slit lamp microscopy/  
53 slit lamp\*.mp.
- 54 ((eye or ocular or fundus or direct or indirect or ophthalmic) adj3 exam\$).mp.  
(30385)
- 55 slitlamp\*.mp.
- 56 ophthalmoscop\*.mp.
- 57 face to face.mp.
- 58 Office Visits/

59 ((office or clinic\* or in person) adj3 (visit\$ or exam\* or consult\*)).mp. [mp=title, abstract, original title, name of substance word, subject heading word, floating subheading word, keyword heading word, organism supplementary concept word, protocol supplementary concept word, rare disease supplementary concept word, unique identifier, synonyms]

60 or/48-59

61 26 and 47 and 60

62 limit 61 to yr="2010 -Current"

63 limit 62 to "review"

64 62 not 63

Supplementary Table 2: Summary of characteristics of included studies.

| Primary Author            | Study Design             | Country  | Recruitment Period | Sample Size | Age mean (range) | Sex (female%) | Years Since diagnosis of diabetes mellitus | Setting                                                              | Imaging Device            | Mydriasis   | Imaging Protocol  |                                                                              |
|---------------------------|--------------------------|----------|--------------------|-------------|------------------|---------------|--------------------------------------------|----------------------------------------------------------------------|---------------------------|-------------|-------------------|------------------------------------------------------------------------------|
|                           |                          |          |                    |             |                  |               |                                            |                                                                      |                           |             | Observation Angle | Number of Fields                                                             |
| <b>Ahsan [1] 2014</b>     | Cross sectional          | Pakistan | 2009-2010          | 728         | 48.8             | 63%           | 9.17                                       | Outpatient eye hospital providing screening for diabetic retinopathy | Canon CR-1                | Dilated     | 45 degrees        | 2, centred on macula/centred on optic disk                                   |
| <b>Andonegui [2] 2016</b> | Cross sectional          | Spain    | Not provided       | 201         | 81 (64-96)       | 56%           | Not applicable                             | Outpatient ophthalmology clinic                                      | Carl Zeiss Visucam Pro NM | Unclear     | Not provided      | Not provided                                                                 |
| <b>Azrak [3] 2015</b>     | Cross sectional          | Spain    | 2012-2013          | 136         | 63               | Not provided  | 13.8                                       | Outpatient ophthalmology clinic                                      | Topcon 3D OCT-2000        | Unclear     | 45 degrees        | 1, macula covering up to nasal border of optic disk                          |
| <b>Toy [4] 2016</b>       | Cross sectional          | USA      | 2014               | 100         | 60.5             | 58%           | 11.9                                       | Outpatient ophthalmology clinic                                      | iphone 5s                 | Dilated     | 45 degrees        | Unknown number, external, and fundus from disk to macula                     |
| <b>Maa [5] 2014</b>       | Cross sectional          | USA      | 2012               | 52          | Not provided     | Not provided  | Not applicable                             | Outpatient ophthalmology clinic                                      | Not provided              | Dilated     | Wide angle        | 4, disk-macula, supratemporal, nasal and external                            |
| <b>Litvin [6] 2017</b>    | Cross sectional          | USA      | 2014-2015          | 207         | 53.6             | 59%           | 8.9                                        | Outpatient ophthalmology clinic                                      | Canon CR DGI              | Dilated     | 45 degrees        | 1, temporal to the macula and including the macula.                          |
| <b>Conlin [7] 2015</b>    | Repeated cross sectional | USA      | Not provided       | 389         | 67.2 (18-80)     | 5%            | 12.1                                       | Veterans Affairs Health System                                       | Topcon TRC                | Non-dilated | 45 degrees        | 4, macula, superior temporal optic disk, inferior nasal optic disk, external |
| <b>Borrelli [8] 2020</b>  | Cross sectional          | Italy    | Not provided       | 40          | 58 (31-80)       | 40%           | Not provided                               | Outpatient eye hospital providing screening for diabetic retinopathy | DRSplus confocal system   | Non-dilated | 45 degrees        | 6-field mosaic overlapping image                                             |

|                             |                          |          |              |      |                      |              |              |                                                                      |                                                                 |             |                                                                                             |                                                                                                                                                                 |
|-----------------------------|--------------------------|----------|--------------|------|----------------------|--------------|--------------|----------------------------------------------------------------------|-----------------------------------------------------------------|-------------|---------------------------------------------------------------------------------------------|-----------------------------------------------------------------------------------------------------------------------------------------------------------------|
| <b>Bilong [9] 2019</b>      | Cross sectional          | Cameron  | 2017-2018    | 440  | 57.7                 | 63%          | 7.9          | Outpatient ophthalmology clinic                                      | MII Ret Cam coupled with a smartphone (iphone 5s) and 20D lens  | Dilated     | Not provided                                                                                | 2, macula and optic nerve                                                                                                                                       |
| <b>Ding [10] 2012</b>       | Cross sectional          | China    | 2007         | 531  | Not provided (35-84) | 62%          | Not provided | Outpatient eye hospital providing screening for diabetic retinopathy | Canon CR6-4NM                                                   | Dilated     | 45 degrees                                                                                  | 2, macula and nasal photograph                                                                                                                                  |
| <b>Silva [11] 2012</b>      | Cross sectional          | USA      | Not provided | 126  | 49 (24-83)           | 46%          | 21.1         | Outpatient eye hospital providing screening for diabetic retinopathy | Topcon NW6S camera interface with the MegaVision digital camera | Non-dilated | 3, 45 degrees stereoscopic fields, 2, 30 degrees stereoscopic, 1 external image of each eye | 6, 3 (centred between optic disk and macula, along the superior temporal vascular arcade, nasal, and inferior to disk), 2 (optic disk and macula), 1 (External) |
| <b>Russo [12] 2015</b>      | Cross sectional          | Italy    | Not provided | 240  | 58.8                 | 54%          | 11.6         | Outpatient ophthalmology clinic                                      | iPhone 5 and D-Eye adapter                                      | Dilated     | 20 degrees                                                                                  | Not provided                                                                                                                                                    |
| <b>Fahadullah [13] 2019</b> | Cross sectional          | Pakistan | 2015         | 2350 | 53.5 (20-95)         | 51%          | Not provided | Outpatient eye hospital providing screening for diabetic retinopathy | Canon CR-1                                                      | Non-dilated | 45 degrees                                                                                  | 1                                                                                                                                                               |
| <b>Sengupta[14] 2018</b>    | Cross sectional          | India    | 2014-2015    | 275  | 55.7 (37-81)         | 37%          | 9.6          | Outpatient ophthalmology clinic                                      | Topcon TRC-50DX                                                 | Dilated     | 45 degrees                                                                                  | 3, macula, nasal and supratemporal arcade                                                                                                                       |
| <b>Toy [15] 2016</b>        | Repeated cross sectional | USA      | 2008-2012    | 1521 | 55.4                 | Not provided | 46.8         | Outpatient ophthalmology clinic                                      | Nidek NM-1000                                                   | Non-dilated | 45 degrees                                                                                  | 1, macula                                                                                                                                                       |
| <b>Wilson [16] 2010</b>     | Cross sectional          | Scotland | Not provided | 380  | Not provided         | Not provided | Not provided | Outpatient ophthalmology clinic                                      | Wide field scanning laser ophthalmoscope                        | Non-dilated | 136 degrees                                                                                 | 1                                                                                                                                                               |
| <b>Litvin [17] 2014</b>     | Cross sectional          | USA      | Not provided | 206  | 56                   | 49%          | Not provided | Outpatient ophthalmology clinic                                      | Canon CR6-45NM                                                  | Non-dilated | 45 degrees                                                                                  | 3, macula, optic disk, optic nerve and macula                                                                                                                   |

|                            |                               |           |              |      |              |              |                |                                                                      |                       |             |              |                                        |
|----------------------------|-------------------------------|-----------|--------------|------|--------------|--------------|----------------|----------------------------------------------------------------------|-----------------------|-------------|--------------|----------------------------------------|
| <b>Silva [18] 2013</b>     | Cross sectional               | USA       | Not provided | 206  | 53.9 (18-88) | 50%          | Not provided   | Outpatient tertiary diabetes care centre                             | DiSLO200              | Dilated     | 200 degrees  | 1                                      |
| <b>Manjunath [19] 2015</b> | Cross sectional               | UK        | Not provided | 2046 | Not provided | Not provided | Not provided   | Outpatient eye hospital providing screening for diabetic retinopathy | Optomap p2000 and OCT | Dilated     | 200 degrees  | 3, centre looking up, looking down     |
| <b>Ting [20] 2011</b>      | Cross sectional               | Australia | Not provided | 272  | 53.9         | Not provided | 13.9           | Outpatient ophthalmology clinic                                      | FF450 Zeiss           | Dilated     | Not provided | 3, macula, optic disk, temporal retina |
| <b>Ku [21] 2013</b>        | Cross sectional               | Australia | 2005-2008    | 706  | 48 (20-83)   | 64%          | Not provided   | Remote community clinic for diabetic retinopathy screening           | Topcon TRC-NW100      | Dilated     | 45 degrees   | 1, centred on the fovea                |
| <b>Maa [22] 2020</b>       | Cross sectional               | USA       | 2015-2017    | 256  | 60           | 87%          | Not applicable | Veterans Affairs Health System                                       | Canon CX-1            | Dilated     | 45 degrees   | 3 retina, 1 external                   |
| <b>Sengupta [23] 2019</b>  | Cross sectional               | India     | 2015-2016    | 231  | 54.1         | 65%          | 10.7           | Outpatient eye hospital providing screening for diabetic retinopathy | Topcon TRC-50DX       | Dilated     | 45 degrees   | 3, macula, supertemporal, nasal        |
| <b>Szeto [24] 2018</b>     | Cross sectional               | Hong Kong | 2015-2016    | 322  | 66.6         | 48%          | 13.3           | Outpatient eye hospital providing screening for diabetic retinopathy | UWF-SLO Daytona       | Dilated     | 200 degrees  | 1                                      |
| <b>Duchin [25] 2015</b>    | Cross sectional               | USA       | Not provided | 94   | 74 (577-88)  | 0%           | Not applicable | Veterans Affairs Health System                                       | Topcon NW-8           | Non-dilated | Not provided | 1, macula                              |
| <b>Healy [26] 2013</b>     | Retrospective cross sectional | UK        | 2008-2011    | 3002 | 65* (17-100) | Not provided | Not provided   | Outpatient ophthalmology clinic                                      | Not provided          | Dilated     | Not provided | 2, macula and disc-centered            |
| <b>Nanji [27] 2020</b>     | Cross sectional               | Kenya     | 2011         | 538  | 62 (33-91)   | Not provided | 5*             | Outpatient ophthalmology clinic                                      | Topcon 777            | Dilated     | 45 degrees   | 3                                      |

|                                 |                 |       |      |     |      |     |                |                                 |        |         |                                                 |         |
|---------------------------------|-----------------|-------|------|-----|------|-----|----------------|---------------------------------|--------|---------|-------------------------------------------------|---------|
| <b>Maruyama-Inoue [28] 2020</b> | Cross sectional | Japan | 2020 | 109 | 77.5 | 71% | Not applicable | Outpatient ophthalmology clinic | Clarus | Dilated | Single shot 133 degrees or montaged 200 degrees | Unclear |
|---------------------------------|-----------------|-------|------|-----|------|-----|----------------|---------------------------------|--------|---------|-------------------------------------------------|---------|

\*Median

**Supplementary Table 3.** Definitions of diabetic eye disease and age-related macular degeneration severity.

| <b>Study ID</b>             | <b>DME Definition</b>                                           | <b>Treatable DR Definition</b>                       | <b>Treatable AMD Definition</b>                                                               |
|-----------------------------|-----------------------------------------------------------------|------------------------------------------------------|-----------------------------------------------------------------------------------------------|
| <b>Ahsan[1] 2014</b>        | Not provided                                                    | severe non-proliferative and worse or DME (ICDR)*    | Not applicable                                                                                |
| <b>Andonegui [2] 2016</b>   | Not applicable                                                  | Not applicable                                       | Persistent macular fluid, visual acuity loss with macular fluid, new onset macular hemorrhage |
| <b>Azrak [3] 2015</b>       | Hard exudate or retinal thickening within 500 microns of macula | Pre-proliferative, proliferative, DME (ETDRS)†       | Not applicable                                                                                |
| <b>Toy [4] 2016</b>         | Presence of hard exudate                                        | Moderate non-proliferative and worse (ICDR)*         | Not applicable                                                                                |
| <b>Maa[5] 2014</b>          | Not applicable                                                  | Not applicable                                       | Not applicable                                                                                |
| <b>Litvin [6] 2017</b>      | CSME (ETDRS)†                                                   | Not applicable                                       | Not applicable                                                                                |
| <b>Conlin [7] 2015</b>      | Not provided                                                    | Moderate non-proliferative (ICDR)*                   | Category 3 or higher (ARED)‡                                                                  |
| <b>Borrelli [8] 2020</b>    | Not provided                                                    | Moderate non-proliferative and worse (ETDRS)†        | Not applicable                                                                                |
| <b>Bilong [9] 2019</b>      | Hard exudate within one disk diameter of macula                 | Not provided (ICDR)*                                 | Not applicable                                                                                |
| <b>Ding [10] 2012</b>       | Not provided                                                    | Pre-proliferative, proliferative, DME (UKNSC)**      | Not applicable                                                                                |
| <b>Silva [11] 2012</b>      | Not provided                                                    | Moderate non-proliferative (ETDRS)†                  | Not applicable                                                                                |
| <b>Russo [12] 2015</b>      | CSME (ETDRS)†                                                   | Moderate non-proliferative and worse (ICDR)*         | Not applicable                                                                                |
| <b>Fahadullah [13] 2019</b> | Not applicable                                                  | Not applicable                                       | Not applicable                                                                                |
| <b>Sengupta[14] 2018</b>    | CSME (NHS)††                                                    | Severe NPDR or worse and/or presence of CSME (NHS)†† | Not applicable                                                                                |
| <b>Toy [15] 2016</b>        | Not provided                                                    | Moderate non-proliferative and worse (ICDR)*         | Not applicable                                                                                |



|                            |                                                                                                                                                                                             |                                                      |                            |
|----------------------------|---------------------------------------------------------------------------------------------------------------------------------------------------------------------------------------------|------------------------------------------------------|----------------------------|
| <b>Wilson [16] 2010</b>    | Exudate or blot hemorrhage within 1 disk diameter of fovea (SDRSS)‡‡                                                                                                                        | Severe non-proliferative and worse or DME (SDRSS) ‡‡ | Not applicable             |
| <b>Litvin [17] 2014</b>    | Exudate within one disk diameter of fovea as surrogate marker for CSME                                                                                                                      | Not applicable                                       | Not applicable             |
| <b>Silva [18] 2013</b>     | Not provided                                                                                                                                                                                | Moderate non-proliferative and worse (ETDRS) †       | Not applicable             |
| <b>Manjunath [19] 2015</b> | CSME (ETDRS)†                                                                                                                                                                               | Moderate non-proliferative and worse (UKNSC)**       | Not applicable             |
| <b>Ting [20] 2011</b>      | Not applicable                                                                                                                                                                              | Not applicable                                       | Not applicable             |
| <b>Ku [21] 2013</b>        | Retinal thickening within 500 microns fovea associated with thickening at least one disk area in size and one disk diameter from the fovea                                                  | PDR or DME                                           | Not applicable             |
| <b>Maa [22] 2020</b>       | Not applicable                                                                                                                                                                              | Not applicable                                       | Not applicable             |
| <b>Sengupta [23] 2019</b>  | Not applicable                                                                                                                                                                              | Not applicable                                       | Not applicable             |
| <b>Szeto [24] 2018</b>     | Not provided                                                                                                                                                                                | Moderate non-proliferative                           | Not applicable             |
| <b>Duchin [25] 2015</b>    | Not applicable                                                                                                                                                                              | Not applicable                                       | Scale 3 or higher (ARED) ‡ |
| <b>Healy [26] 2013</b>     | Exudate within 1 disc diameter (DD) of the center of the fovea, circinate or group of exudates within the macula, or any microaneurysm or hemorrhage within 1 DD of the center of the fovea | Pre-proliferative, proliferative, (ETDRS)†           | Not applicable             |

|                                 |                                                                                                        |                |                |
|---------------------------------|--------------------------------------------------------------------------------------------------------|----------------|----------------|
|                                 | but only if associated with a best visual acuity of worse than 0.3 LogMAR equivalent to Snellen 6/12). |                |                |
| <b>Nanji [27] 2020</b>          | Not applicable                                                                                         | Not applicable | Not applicable |
| <b>Maruyama-Inoue [28] 2020</b> | Not applicable                                                                                         | Not applicable | Not applicable |

\*ICDR: International Classification of diabetic retinopathy

†ETDRS: Early treatment of diabetic retinopathy study

‡ARED: Age related eye disease study

\*\*UKNSC: United Kingdom National Screening Committee

††NHS: National Health Service

‡‡SDRSS: Scottish diabetic retinopathy severity scheme

**Supplementary Table 4.** Grading of disease severity.

| Study ID                    | Telemedicine Evaluation |                               | Face to Face Examination |                                           |                                                                                     |
|-----------------------------|-------------------------|-------------------------------|--------------------------|-------------------------------------------|-------------------------------------------------------------------------------------|
|                             | Number of Graders       | Grader Credentials            | Number of Graders        | Credentials                               | Reference Standard                                                                  |
| <b>Ahsan[1] 2014</b>        | 1                       | Retina specialist             | 1                        | Not provided                              | Keeler ophthalmoscope                                                               |
| <b>Andonegui [2] 2016</b>   | 1                       | Retina specialist             | 1                        | Retina specialist                         | noncontact 90D fundus lens                                                          |
| <b>Azrak [3] 2015</b>       | 1                       | Retina specialist             | 1                        | Retina specialist                         | Indirect ophthalmoscopy and Slit lamp fundus biomicroscopy                          |
| <b>Toy [4] 2016</b>         | 2                       | Ophthalmologist               | 1                        | Ophthalmologist                           | Dilated ophthalmoscopy and Slit lamp fundus biomicroscopy                           |
| <b>Maa[5] 2014</b>          | 1                       | Ophthalmologist               | 1                        | Ophthalmologist                           | Not provided                                                                        |
| <b>Litvin [6] 2017</b>      | 2                       | Optometrist                   | 1                        | Optometrist                               | Slit lamp fundus biomicroscopy                                                      |
| <b>Conlin [7] 2015</b>      | 1                       | Optometrist                   | 1                        | Ophthalmologist or optometrist            | Indirect ophthalmoscopy Slit lamp fundus biomicroscopy                              |
| <b>Borrelli [8] 2020</b>    | 1                       | Ophthalmologist               | 1                        | Ophthalmologist                           | Slit lamp fundus biomicroscopy                                                      |
| <b>Bilong [9] 2019</b>      | 1                       | Ophthalmologist               | 1                        | Ophthalmologist                           | Indirect ophthalmoscopy                                                             |
| <b>Ding [10] 2012</b>       | 1                       | Ophthalmologist               | 1                        | Ophthalmologist                           | Slit lamp fundus biomicroscopy                                                      |
| <b>Silva [11] 2012</b>      | 1                       | Optometrist                   | 1                        | Ophthalmologist                           | Not reported                                                                        |
| <b>Russo [12] 2015</b>      | 1                       | Ophthalmologist               | 1                        | Ophthalmologist                           | Slit lamp fundus biomicroscopy                                                      |
| <b>Fahadullah [13] 2019</b> | 1                       | Optometrist                   | 1                        | Ophthalmologist                           | Slit lamp fundus biomicroscopy                                                      |
| <b>Sengupta[14] 2018</b>    | 2                       | Retina specialist             | 2                        | Retina specialist                         | Slit lamp fundus biomicroscopy and indirect ophthalmoscopy using 90D and 20D lenses |
| <b>Toy [15] 2016</b>        | 1                       | Ophthalmologist               | 1                        | Ophthalmologist                           | Slit lamp fundus biomicroscopy and indirect ophthalmoscopy                          |
| <b>Wilson [16] 2010</b>     | 1                       | Ophthalmology research fellow | 1                        | Ophthalmologist or ophthalmology resident | Slit lamp fundus biomicroscopy                                                      |
| <b>Litvin [17] 2014</b>     | 2                       | Optometrist                   | 1                        | Optometrist                               | Slit lamp biomicroscopy with 90D lens                                               |
| <b>Silva [18] 2013</b>      | 1                       | Retina specialist             | 1                        | Retina specialist                         | Dilated retinal exam                                                                |

|                                 |   |                                                          |   |                 |                                                                                    |
|---------------------------------|---|----------------------------------------------------------|---|-----------------|------------------------------------------------------------------------------------|
| <b>Manjunath [19] 2015</b>      | 1 | Ophthalmologist                                          | 1 | Ophthalmologist | Slit lamp fundus biomicroscopy                                                     |
| <b>Ting [20] 2011</b>           | 1 | Ophthalmologist                                          | 1 | Ophthalmologist | Slit lamp fundus biomicroscopy                                                     |
| <b>Ku [21] 2013</b>             | 1 | Ophthalmologist                                          | 1 | Ophthalmologist | Slit lamp fundus biomicroscopy                                                     |
| <b>Maa [22] 2020</b>            | 2 | Ophthalmologist                                          | 1 | Ophthalmologist | Not provided                                                                       |
| <b>Sengupta [23] 2019</b>       | 2 | Ophthalmologist                                          | 1 | Ophthalmologist | Slit lamp fundus biomicroscopy and indirect ophthalmoscopy with 90D and 20D lenses |
| <b>Szeto [24] 2018</b>          | 1 | Ophthalmologist                                          | 1 | Ophthalmologist | Slit lamp fundus biomicroscopy                                                     |
| <b>Duchin [25] 2015</b>         | 2 | Optometrist                                              | 1 | Ophthalmologist | Slit lamp fundus biomicroscopy                                                     |
| <b>Healy [26] 2013</b>          | 1 | Grader with certification from English Screening Program | 1 | Ophthalmologist | Slit lamp fundus biomicroscopy                                                     |
| <b>Nanji [27] 2020</b>          | 1 | Ophthalmologist                                          | 1 | Ophthalmologist | Slit lamp fundus biomicroscopy                                                     |
| <b>Maruyama-Inoue [28] 2020</b> | 2 | Ophthalmologist                                          | 2 | Ophthalmologist | Slit lamp fundus biomicroscopy                                                     |

**Supplementary Table 5.** Diagnostic accuracy of tele-retinal screening for the detection of age-related macular degeneration.

| TP (Patients or Eyes)                             | FN (Patients or Eyes) | FP (Patients or Eyes) | TN (Patients or Eyes) | Sensitivity [95% CI] | Specificity [95% CI] |
|---------------------------------------------------|-----------------------|-----------------------|-----------------------|----------------------|----------------------|
| Any detectable age-related macular degeneration*  |                       |                       |                       |                      |                      |
| 2                                                 | 0                     | 2                     | 48                    | 1.00 [0.16, 1.00]    | 0.96 [0.86, 1.00]    |
| 10                                                | 3                     | 77                    | 299                   | 0.77 [0.46, 0.95]    | 0.80 [0.75, 0.83]    |
| 3                                                 | 3                     | 2                     | 248                   | 0.50 [0.12, 0.88]    | 0.99 [0.97, 1.00]    |
| Any refrerable age-related macular degeneration** |                       |                       |                       |                      |                      |
| 84                                                | 3                     | 17                    | 97                    | 0.97 [0.90, 0.99]    | 0.85 [0.77, 0.91]    |
| 48                                                | 9                     | 2                     | 35                    | 0.84 [0.72, 0.93]    | 0.95 [0.82, 0.99]    |
| 85                                                | 5                     | 2                     | 17                    | 0.94 [0.88, 0.98]    | 0.89 [0.67, 0.99]    |

\*Presence of macular drusen, disciform scar, or choroidal neovascularization with subretinal bleeding or fluid

\*\*Any large drusen (>125 micron), geographic atrophy, or neovascularization

**Supplementary Table 6.** Strength of body of evidence for main outcomes.

| Outcome                                                                                        | No of studies<br>(No of patients) | Study design                                    | Factors that may decrease certainty of evidence |              |                      |             |                  | Effect per 1,000 patients tested |                             |                             | Test accuracy<br>CoE |             |
|------------------------------------------------------------------------------------------------|-----------------------------------|-------------------------------------------------|-------------------------------------------------|--------------|----------------------|-------------|------------------|----------------------------------|-----------------------------|-----------------------------|----------------------|-------------|
|                                                                                                |                                   |                                                 | Risk of bias                                    | Indirectness | Inconsistency        | Imprecision | Publication bias | pre-test probability of 20%      | pre-test probability of 28% | pre-test probability of 40% |                      |             |
| <b>True positives</b><br>(patients with diabetic retinopathy)                                  | 13 studies<br>7207 patients       | cross-sectional<br>(cohort type accuracy study) | serious <sup>a</sup>                            | not serious  | serious <sup>b</sup> | not serious | none             | 182 (164 to 192)                 | 255 (230 to 269)            | 364 (328 to 384)            | ⊕⊕○○<br>Low          |             |
| <b>False negatives</b><br>(patients incorrectly classified as not having diabetic retinopathy) |                                   |                                                 |                                                 |              |                      |             |                  | 18 (8 to 36)                     | 25 (11 to 50)               | 36 (16 to 72)               |                      |             |
| <b>True negatives</b><br>(patients without diabetic retinopathy)                               | 13 studies<br>7207 patients       | cross-sectional<br>(cohort type accuracy study) | serious <sup>a</sup>                            | not serious  | serious <sup>b</sup> | not serious | none             | 704 (592 to 760)                 | 634 (533 to 684)            | 528 (444 to 570)            |                      | ⊕⊕○○<br>Low |
| <b>False positives</b><br>(patients incorrectly classified as having diabetic retinopathy)     |                                   |                                                 |                                                 |              |                      |             |                  | 96 (40 to 208)                   | 86 (36 to 187)              | 72 (30 to 156)              |                      |             |

**Explanations**

a. Inappropriate exclusion of patients who are not great candidates for fundus photography, removal of ungradable images from analysis.

b. Large degree of heterogeneity as presented in sROC curves with large predictive regions.

\*Estimated prevalence obtained from: Zhang X, Saaddine JB, Chou C-F, et al. Prevalence of diabetic retinopathy in the United States, 2005-2008. *Jama* 2010;**304**(6):649-56

|             |                             |
|-------------|-----------------------------|
| Sensitivity | 0.84 (95% CI: 0.76 to 0.90) |
| Specificity | 0.85 (95% CI: 0.75 to 0.91) |

|             |    |    |     |
|-------------|----|----|-----|
| Prevalence* | 2% | 4% | 10% |
|-------------|----|----|-----|

| Outcome                                                                                          | No of studies<br>(No of patients) | Study design                                    | Factors that may decrease certainty of evidence |              |                          |             |                  | Effect per 1,000 patients tested |                            |                             | Test accuracy<br>CoE |
|--------------------------------------------------------------------------------------------------|-----------------------------------|-------------------------------------------------|-------------------------------------------------|--------------|--------------------------|-------------|------------------|----------------------------------|----------------------------|-----------------------------|----------------------|
|                                                                                                  |                                   |                                                 | Risk of bias                                    | Indirectness | Inconsistency            | Imprecision | Publication bias | pre-test probability of 2%       | pre-test probability of 4% | pre-test probability of 10% |                      |
| <b>True positives</b><br>(patients with diabetic macular edema)                                  | 6 studies<br>4255 patients        | cross-sectional<br>(cohort type accuracy study) | serious <sup>a</sup>                            | not serious  | not serious <sup>b</sup> | not serious | none             | 17 (15 to 18)                    | 34 (30 to 36)              | 84 (76 to 90)               | ⊕⊕⊕○<br>Moderate     |
| <b>False negatives</b><br>(patients incorrectly classified as not having diabetic macular edema) |                                   |                                                 |                                                 |              |                          |             |                  | 3 (2 to 5)                       | 6 (4 to 10)                | 16 (10 to 24)               |                      |
| <b>True negatives</b><br>(patients without diabetic macular edema)                               | 6 studies<br>4255 patients        | cross-sectional<br>(cohort type accuracy study) | serious <sup>a</sup>                            | not serious  | not serious <sup>b</sup> | not serious | none             | 833 (735 to 892)                 | 816 (720 to 874)           | 765 (675 to 819)            | ⊕⊕⊕○<br>Moderate     |
| <b>False positives</b><br>(patients incorrectly classified as having diabetic macular edema)     |                                   |                                                 |                                                 |              |                          |             |                  | 147 (88 to 245)                  | 144 (86 to 240)            | 135 (81 to 225)             |                      |

#### Explanations

a. Inappropriate exclusion of patients who are not great candidates for fundus photography, removal of ungradable images from analysis.

b. Mild-moderate degree of heterogeneity as presented in sROC curves with smaller predictive regions.

\*Estimated prevalence obtained from: Varma R, Bressler NM, Doan QV, et al. Prevalence of and risk factors for diabetic macular edema in the United States. *JAMA ophthalmology* 2014;132(11):1334-40

|             |                             |
|-------------|-----------------------------|
| Sensitivity | 0.88 (95% CI: 0.81 to 0.93) |
| Specificity | 0.86 (95% CI: 0.79 to 0.90) |

|             |    |    |     |
|-------------|----|----|-----|
| Prevalence* | 2% | 4% | 10% |
|-------------|----|----|-----|

| Outcome                                                                                                  | No of studies<br>(No of patients) | Study design                                    | Factors that may decrease certainty of evidence |              |                          |             |                  | Effect per 1,000 patients tested |                            |                             | Test accuracy<br>CoE |
|----------------------------------------------------------------------------------------------------------|-----------------------------------|-------------------------------------------------|-------------------------------------------------|--------------|--------------------------|-------------|------------------|----------------------------------|----------------------------|-----------------------------|----------------------|
|                                                                                                          |                                   |                                                 | Risk of bias                                    | Indirectness | Inconsistency            | Imprecision | Publication bias | pre-test probability of 2%       | pre-test probability of 4% | pre-test probability of 10% |                      |
| <b>True positives</b><br>(patients with referable diabetic retinopathy)                                  | 10 studies<br>6373 patients       | cross-sectional<br>(cohort type accuracy study) | serious <sup>a</sup>                            | not serious  | not serious <sup>b</sup> | not serious | none             | 18 (16 to 19)                    | 35 (32 to 37)              | 88 (81 to 93)               | ⊕⊕⊕○<br>Moderate     |
| <b>False negatives</b><br>(patients incorrectly classified as not having referable diabetic retinopathy) |                                   |                                                 |                                                 |              |                          |             |                  | 2 (1 to 4)                       | 5 (3 to 8)                 | 12 (7 to 19)                |                      |
| <b>True negatives</b><br>(patients without referable diabetic retinopathy)                               | 10 studies<br>6373 patients       | cross-sectional<br>(cohort type accuracy study) | serious <sup>a</sup>                            | not serious  | not serious <sup>b</sup> | not serious | none             | 843 (774 to 882)                 | 826 (758 to 864)           | 774 (711 to 810)            | ⊕⊕⊕○<br>Moderate     |
| <b>False positives</b><br>(patients incorrectly classified as having referable diabetic retinopathy)     |                                   |                                                 |                                                 |              |                          |             |                  | 137 (98 to 206)                  | 134 (96 to 202)            | 126 (90 to 189)             |                      |

### Explanations

a. Inappropriate exclusion of patients who are not great candidates for fundus photography, removal of ungradable images from analysis.

b. Mild-moderate degree of heterogeneity as presented in sROC curves with smaller predictive regions.

\*Estimated prevalence obtained from: Zhang X, Saaddine JB, Chou C-F, et al. Prevalence of diabetic retinopathy in the United States, 2005-2008. *Jama* 2010;**304**(6):649-56



|             |                             |
|-------------|-----------------------------|
| Sensitivity | 0.71 (95% CI: 0.49 to 0.86) |
| Specificity | 0.88 (95% CI: 0.85 to 0.90) |

|             |    |    |     |
|-------------|----|----|-----|
| Prevalence* | 5% | 8% | 10% |
|-------------|----|----|-----|

| Outcome                                                                       | No of studies<br>(No of patients) | Study design                                    | Factors that may decrease certainty of evidence |              |                      |                      |                  | Effect per 1,000 patients tested |                            |                             | Test accuracy<br>CoE |
|-------------------------------------------------------------------------------|-----------------------------------|-------------------------------------------------|-------------------------------------------------|--------------|----------------------|----------------------|------------------|----------------------------------|----------------------------|-----------------------------|----------------------|
|                                                                               |                                   |                                                 | Risk of bias                                    | Indirectness | Inconsistency        | Imprecision          | Publication bias | pre-test probability of 5%       | pre-test probability of 8% | pre-test probability of 10% |                      |
| <b>True positives</b><br>(patients with AMD)                                  | 3 studies<br>697 patients         | cross-sectional<br>(cohort type accuracy study) | not serious                                     | not serious  | serious <sup>a</sup> | serious <sup>b</sup> | none             | 36 (25 to 43)                    | 57 (39 to 69)              | 71 (49 to 86)               | ⊕⊕○○<br>Low          |
| <b>False negatives</b><br>(patients incorrectly classified as not having AMD) |                                   |                                                 |                                                 |              |                      |                      |                  | 14 (7 to 25)                     | 23 (11 to 41)              | 29 (14 to 51)               |                      |
| <b>True negatives</b><br>(patients without AMD)                               | 3 studies<br>697 patients         | cross-sectional<br>(cohort type accuracy study) | not serious                                     | not serious  | serious <sup>a</sup> | serious <sup>b</sup> | none             | 836 (808 to 855)                 | 810 (782 to 828)           | 792 (765 to 810)            | ⊕⊕○○<br>Low          |
| <b>False positives</b><br>(patients incorrectly classified as having AMD)     |                                   |                                                 |                                                 |              |                      |                      |                  | 114 (95 to 142)                  | 110 (92 to 138)            | 108 (90 to 135)             |                      |

### Explanations

a. Large degree of heterogeneity as shown in Supplementary Table 4.

b. Data based on limited sample size.

\*Estimated prevalence obtained from: 1. Wong WL, Su X, Li X, et al. Global prevalence of age-related macular degeneration and disease burden projection for 2020 and 2040: a systematic review and meta-analysis. *The Lancet Global Health* 2014;2(2):e106-e16

## References

1. Ahsan S, Basit A, Ahmed KR, et al. Diagnostic accuracy of direct ophthalmoscopy for detection of diabetic retinopathy using fundus photographs as a reference standard. *Diabetes & Metabolic Syndrome: Clinical Research & Reviews* 2014;**8**(2):96-101
2. Andonegui J, Aliseda D, Serrano L, et al. Evaluation of a telemedicine model to follow up patients with exudative age-related macular degeneration. *Retina* 2016;**36**(2):279-84
3. Azrak C, Baeza-Díaz MV, Palazón-Bru A, et al. Validity of optical coherence tomography as a diagnostic method for diabetic retinopathy and diabetic macular edema. *Medicine* 2015;**94**(38)
4. Toy BC, Myung DJ, He L, et al. Smartphone-based dilated fundus photography and near visual acuity testing as inexpensive screening tools to detect referral warranted diabetic eye disease. *Retina* 2016;**36**(5):1000-08
5. Maa AY, Evans C, DeLaune WR, Patel PS, Lynch MG. A novel tele-eye protocol for ocular disease detection and access to eye care services. *Telemedicine and e-Health* 2014;**20**(4):318-23
6. Litvin TV, Bresnick GH, Cuadros JA, Selvin S, Kanai K, Ozawa GY. A revised approach for the detection of sight-threatening diabetic macular edema. *JAMA ophthalmology* 2017;**135**(1):62-68
7. Conlin PR, Asefzadeh B, Pasquale LR, Selvin G, Lamkin R, Cavallerano AA. Accuracy of a technology-assisted eye exam in evaluation of referable diabetic retinopathy and concomitant ocular diseases. *British Journal of Ophthalmology* 2015;**99**(12):1622-27
8. Borrelli E, Querques L, Lattanzio R, et al. Nonmydriatic widefield retinal imaging with an automatic white LED confocal imaging system compared with dilated ophthalmoscopy in screening for diabetic retinopathy. *Acta diabetologica* 2020
9. Bilong Y, Katte JC, Koki G, et al. Validation of smartphone-based retinal photography for diabetic retinopathy screening. *Ophthalmic Surgery, Lasers and Imaging Retina* 2019;**50**(5):S18-S22
10. Ding J, Zou Y, Liu N, et al. Strategies of digital fundus photography for screening diabetic retinopathy in a diabetic population in urban China. *Ophthalmic epidemiology* 2012;**19**(6):414-19
11. Silva PS, Cavallerano JD, Sun JK, Soliman AZ, Aiello LM, Aiello LP. Peripheral lesions identified by mydriatic ultrawide field imaging: distribution and potential impact on diabetic retinopathy severity. *Ophthalmology* 2013;**120**(12):2587-95
12. Russo A, Morescalchi F, Costagliola C, Delcassi L, Semeraro F. Comparison of smartphone ophthalmoscopy with slit-lamp biomicroscopy for grading diabetic retinopathy. *American journal of ophthalmology* 2015;**159**(2):360-64. e1
13. Fahadullah M, Memon NA, Salim S, et al. Diagnostic accuracy of non-mydriatic fundus camera for screening of diabetic retinopathy: A hospital based observational study in Pakistan. *Innovation* 2019;**69**(3)
14. Sengupta S, Sindal M, Besirli C, et al. Screening for vision-threatening diabetic retinopathy in South India: comparing portable non-mydriatic and standard fundus cameras and clinical exam. *Eye* 2018;**32**(2):375-83
15. Toy BC, Aguinaldo T, Eliason J, Egbert J. Non-mydriatic fundus camera screening for referral-warranted diabetic retinopathy in a Northern California safety-net setting. *Ophthalmic Surgery, Lasers and Imaging Retina* 2016;**47**(7):636-42

16. Wilson P, Ellis J, MacEwen C, Ellingford A, Talbot J, Leese G. Screening for diabetic retinopathy: a comparative trial of photography and scanning laser ophthalmoscopy. *Ophthalmologica* 2010;**224**(4):251-57
17. Litvin TV, Ozawa GY, Bresnick GH, et al. Utility of hard exudates for the screening of macular edema. *Optometry and vision science: official publication of the American Academy of Optometry* 2014;**91**(4):370
18. Silva PS, Walia S, Cavallerano JD, et al. Comparison of low-light nonmydriatic digital imaging with 35-mm ETDRS seven-standard field stereo color fundus photographs and clinical examination. *TELEMEDICINE and e-HEALTH* 2012;**18**(7):492-99
19. Manjunath V, Papastavrou V, Steel D, et al. Wide-field imaging and OCT vs clinical evaluation of patients referred from diabetic retinopathy screening. *Eye* 2015;**29**(3):416-23
20. Ting DS, Tay-Kearney ML, Kanagasingam Y. Light and portable novel device for diabetic retinopathy screening. *Clinical & experimental ophthalmology* 2012;**40**(1):e40-e46
21. Ku JJY, Landers J, Henderson T, Craig JE. The reliability of single-field fundus photography in screening for diabetic retinopathy: the Central Australian Ocular Health Study. *Medical Journal of Australia* 2013;**198**(2):93-96
22. Maa AY, McCord S, Lu X, et al. The Impact of OCT on Diagnostic Accuracy of the Technology-Based Eye Care Services Protocol: Part II of the Technology-Based Eye Care Services Compare Trial. *Ophthalmology* 2020;**127**(4):544-49 doi: 10.1016/j.ophtha.2019.10.025.
23. Sengupta S, Sindal MD, Baskaran P, Pan U, Venkatesh R. Sensitivity and specificity of smartphone-based retinal imaging for diabetic retinopathy: a comparative study. *Ophthalmology Retina* 2019;**3**(2):146-53
24. Szeto SK, Wong R, Lok J, et al. Non-mydratic ultrawide field scanning laser ophthalmoscopy compared with dilated fundal examination for assessment of diabetic retinopathy and diabetic macular oedema in Chinese individuals with diabetes mellitus. *British Journal of Ophthalmology* 2019;**103**(9):1327-31
25. Duchin KS, Asefzadeh B, Poulaki V, Rett D, Marescalchi P, Cavallerano A. Teleretinal imaging for detection of referable macular degeneration. *Optometry and Vision Science* 2015;**92**(6):714-18
26. Healy R, Sallam A, Jones V, et al. Agreement between photographic screening and hospital biomicroscopy grading of diabetic retinopathy and maculopathy. *European journal of ophthalmology* 2014;**24**(4):550-58
27. Nanji K, Kherani IN, Damji KF, Nyenze M, Kiage D, Tennant MT. The Muranga Teleophthalmology Study: A Comparison of Virtual (Teleretina) Assessment with in-person Clinical Examination to Diagnose Diabetic Retinopathy and Age-related Macular Degeneration in Kenya. *Middle East Afr J Ophthalmol* 2020;**27**(2):91-99 doi: 10.4103/meajo.MEAJO\_144\_19.
28. Maruyama-Inoue M, Kitajima Y, Mohamed S, et al. Sensitivity and specificity of high-resolution wide field fundus imaging for detecting neovascular age-related macular degeneration. *PLoS One* 2020;**15**(8):e0238072 doi: 10.1371/journal.pone.0238072.
