# Supplementary material for: Diagnostic accuracy of teleretinal screening for detection of diabetic retinopathy and age-related macular degeneration: a systematic review and meta-analysis
Source: HighWire-hosted journal article supplement (doi:10.1136/bmjophth-2021-000915), 2022-02-01
Supplement: bmjophth-2021-000915supp007_data_supplement.pdf [file bmjophth-2021-000915supp007_data_supplement.pdf]

|                     | Risk of Bias      |            |                    |                 | Applicability Concerns |            |                    |
|---------------------|-------------------|------------|--------------------|-----------------|------------------------|------------|--------------------|
|                     | Patient Selection | Index Test | Reference Standard | Flow and Timing | Patient Selection      | Index Test | Reference Standard |
| Ahsan 2014          | High              | Low        | Unclear            | High            | High                   | Low        | Low                |
| Andonegui 2016      | Unclear           | Low        | Low                | Low             | High                   | Low        | Low                |
| Azrak 2015          | High              | Low        | Low                | Low             | Low                    | Low        | Low                |
| Bilong2019          | Low               | Low        | Low                | Unclear         | Low                    | Low        | Low                |
| Borrelli 2020       | High              | Low        | Low                | Low             | Low                    | Low        | Low                |
| Conlin 2015         | Unclear           | Low        | Low                | Low             | Low                    | Low        | Low                |
| Ding 2012           | Low               | Low        | Low                | Low             | Low                    | Low        | Low                |
| Duchin 2015         | High              | Low        | Low                | High            | High                   | Low        | Low                |
| Fahadullah 2019     | Unclear           | Low        | Low                | High            | Low                    | Low        | Low                |
| Healy 2013          | Low               | Low        | Low                | High            | Low                    | Low        | Low                |
| Ku2013              | High              | Low        | Low                | High            | Low                    | Low        | High               |
| Litvin 2014         | High              | Low        | Low                | High            | Low                    | Low        | Low                |
| Litvin 2017         | High              | Unclear    | Low                | Low             | Low                    | Low        | Low                |
| Maa 2014            | Low               | Low        | Low                | Low             | Low                    | Low        | Unclear            |
| Maa 2020            | Unclear           | Low        | Low                | Low             | Unclear                | Low        | Low                |
| Manjunah 2015       | Unclear           | Low        | Low                | High            | Low                    | Low        | Low                |
| Maruyama-Inoue 2020 | High              | Low        | High               | Unclear         | High                   | Low        | Low                |
| Nanji 2020          | High              | Low        | Low                | High            | Low                    | Low        | Low                |
| Russo 2015          | Low               | Low        | Low                | Low             | Low                    | Low        | Low                |
| Sengupta 2018       | High              | Low        | Low                | High            | Low                    | Low        | Low                |
| Sengupta 2019       | High              | Low        | Low                | High            | Low                    | Low        | Low                |
| Silva 2012          | High              | Low        | Low                | Low             | Low                    | Low        | Low                |
| Silva 2013          | High              | Low        | Low                | Low             | Low                    | Low        | Low                |
| Szeto 2018          | Low               | Low        | Low                | Low             | Low                    | Low        | Low                |
| Ting 2011           | Low               | Low        | Low                | Low             | Low                    | Low        | Low                |
| Toy 2016            | Low               | Low        | Low                | Low             | Low                    | Low        | Low                |
| Toy 2016_2          | High              | Low        | Low                | High            | High                   | Low        | Low                |
| Wilson 2010         | High              | Low        | Low                | Low             | Low                    | Low        | Low                |

● High     
 ? Unclear     
 ● Low
