# Supplementary figures and images for: Diagnostic accuracy of teleretinal screening for detection of diabetic retinopathy and age-related macular degeneration: a systematic review and meta-analysis
Source: PubMed Central journal article supplement — BMJ Open Ophthalmol. 2022 Feb 10;7(1):e000915. doi: 10.1136/bmjophth-2021-000915 (PMC8845326; doi:10.1136/bmjophth-2021-000915), 2022-02-10

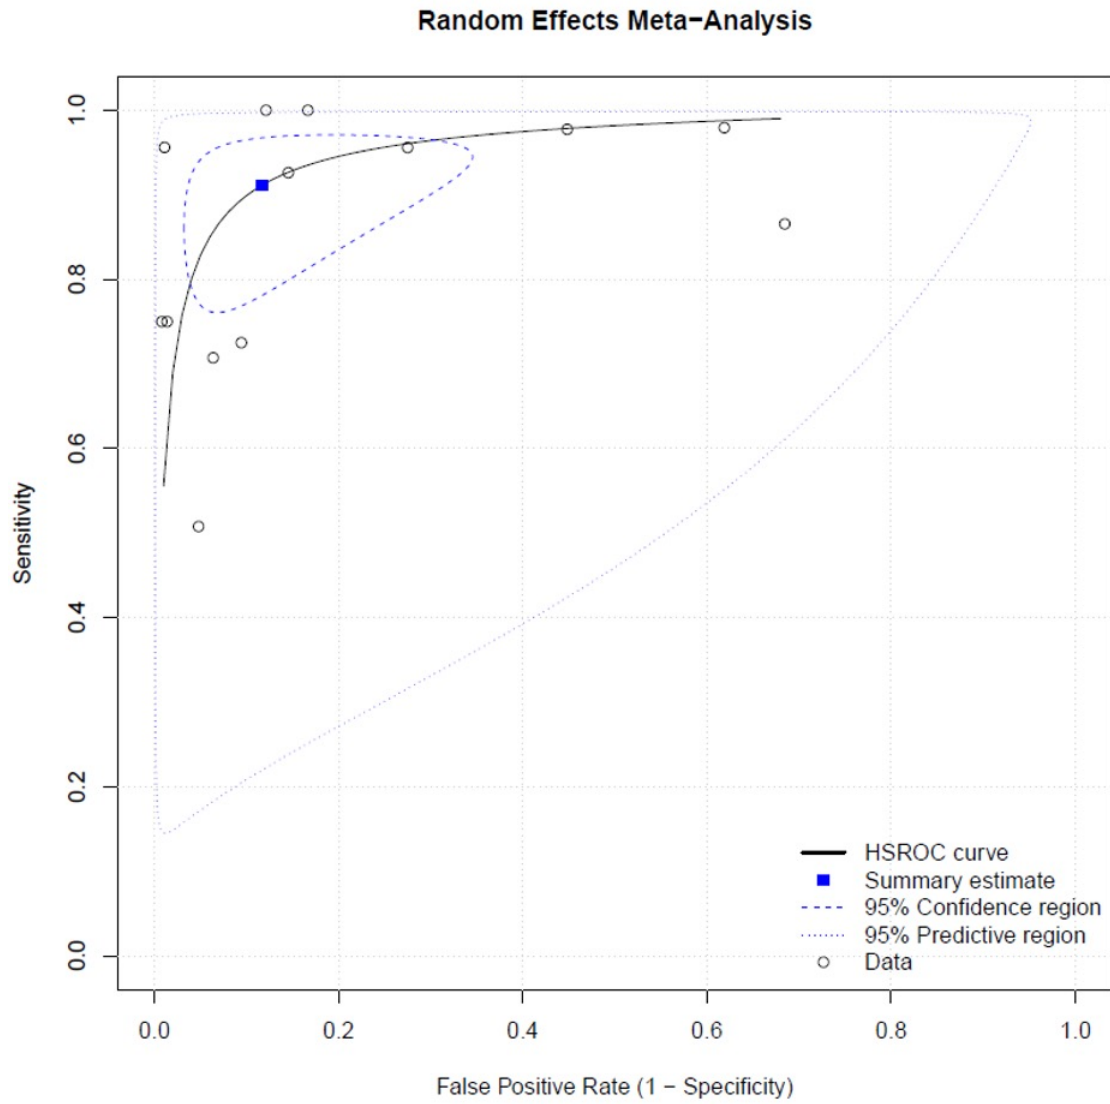

Supplement: bmjophth-2021-000915supp003.pdf [file bmjophth-2021-000915supp003.pdf]

Forest plot of specificity

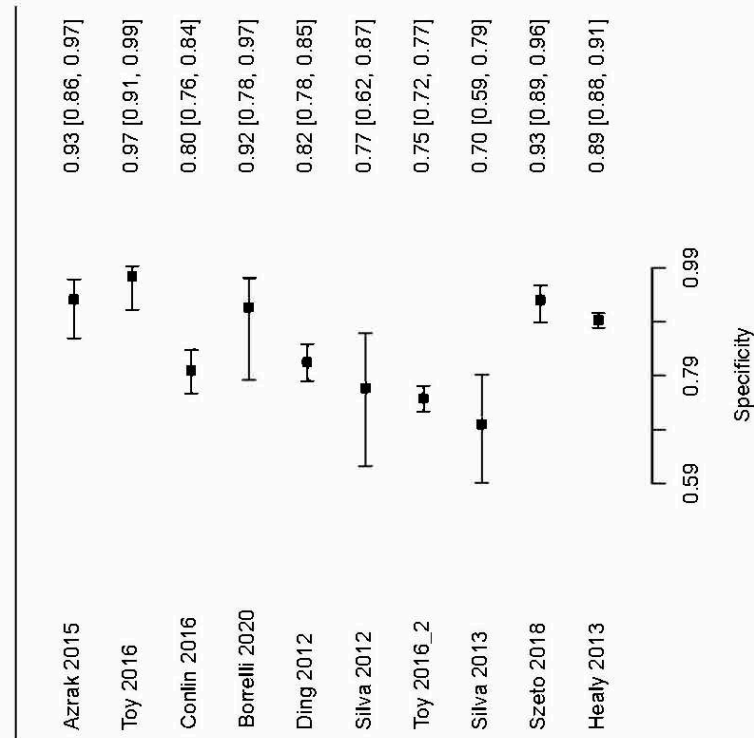

Forest plot of sensitivity

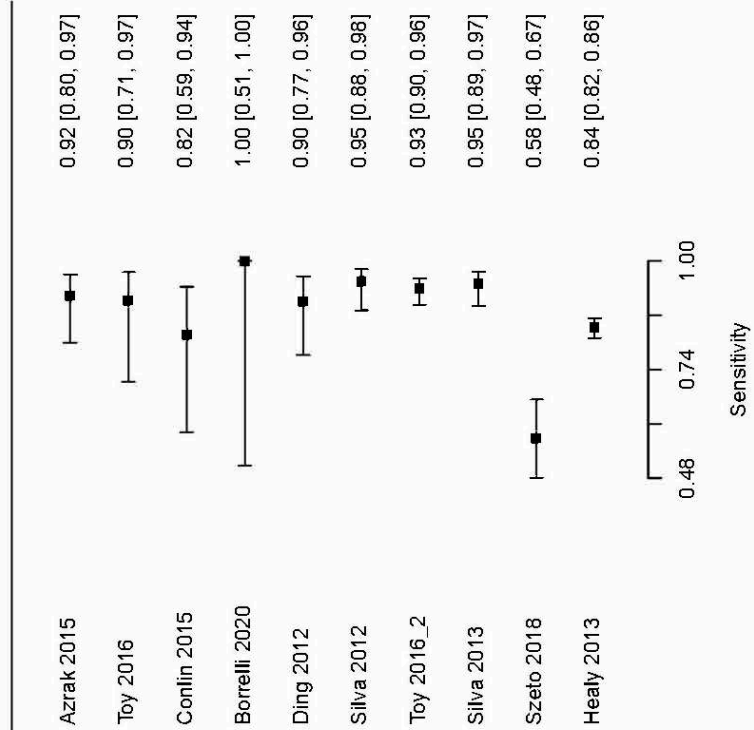

Supplement: bmjophth-2021-000915supp004.pdf [file bmjophth-2021-000915supp004.pdf]

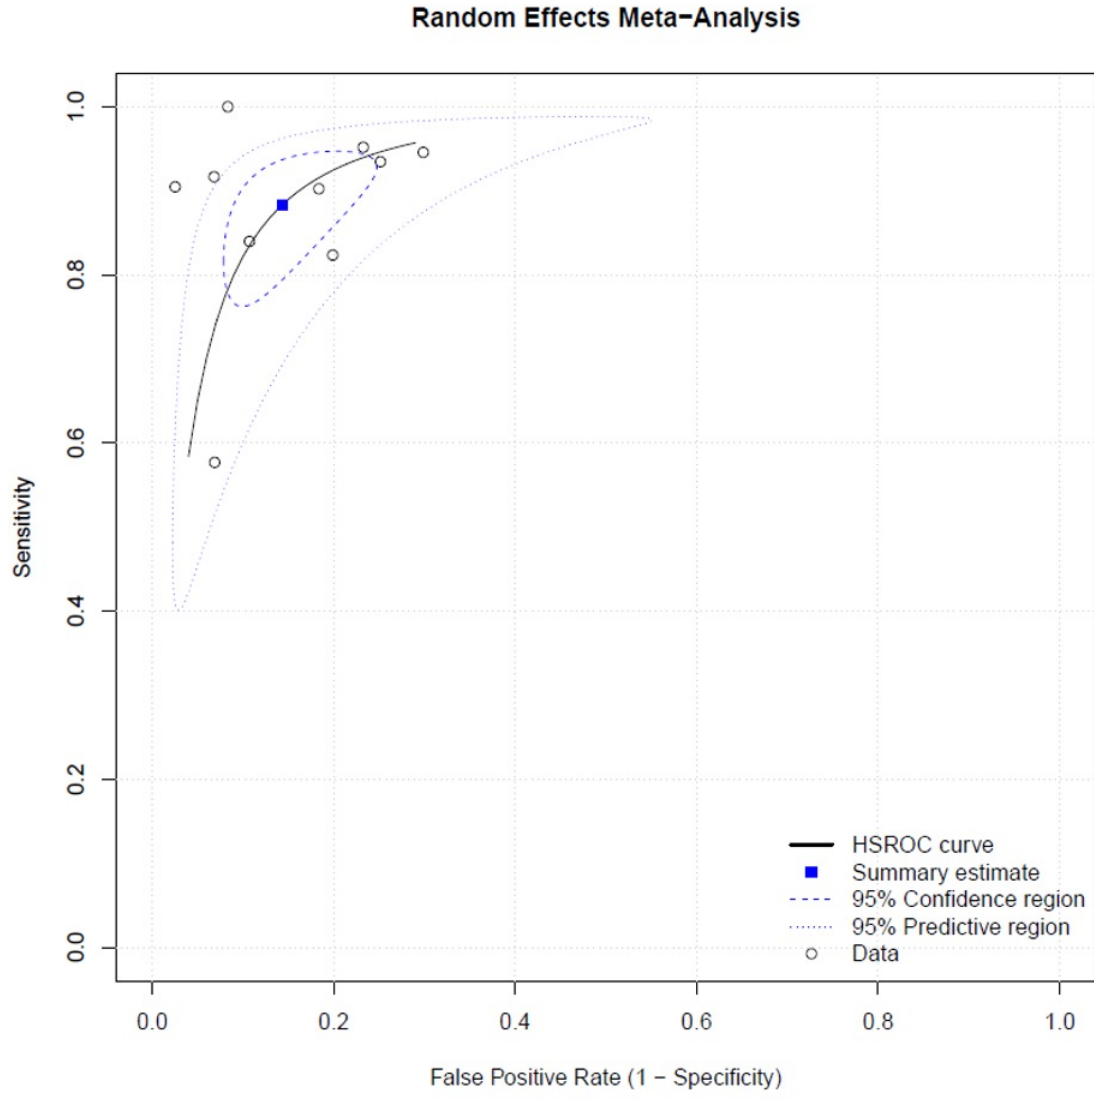

Supplement: bmjophth-2021-000915supp005.pdf [file bmjophth-2021-000915supp005.pdf]

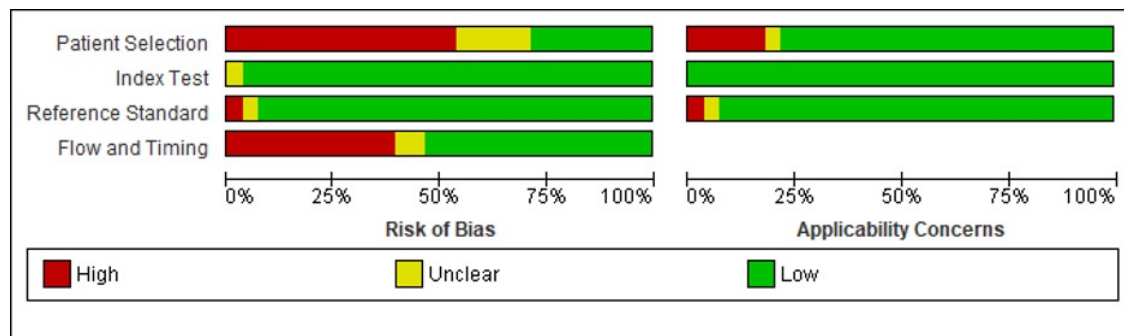

Supplement: bmjophth-2021-000915supp006.pdf [file bmjophth-2021-000915supp006.pdf]

### Random Effects Meta-Analysis

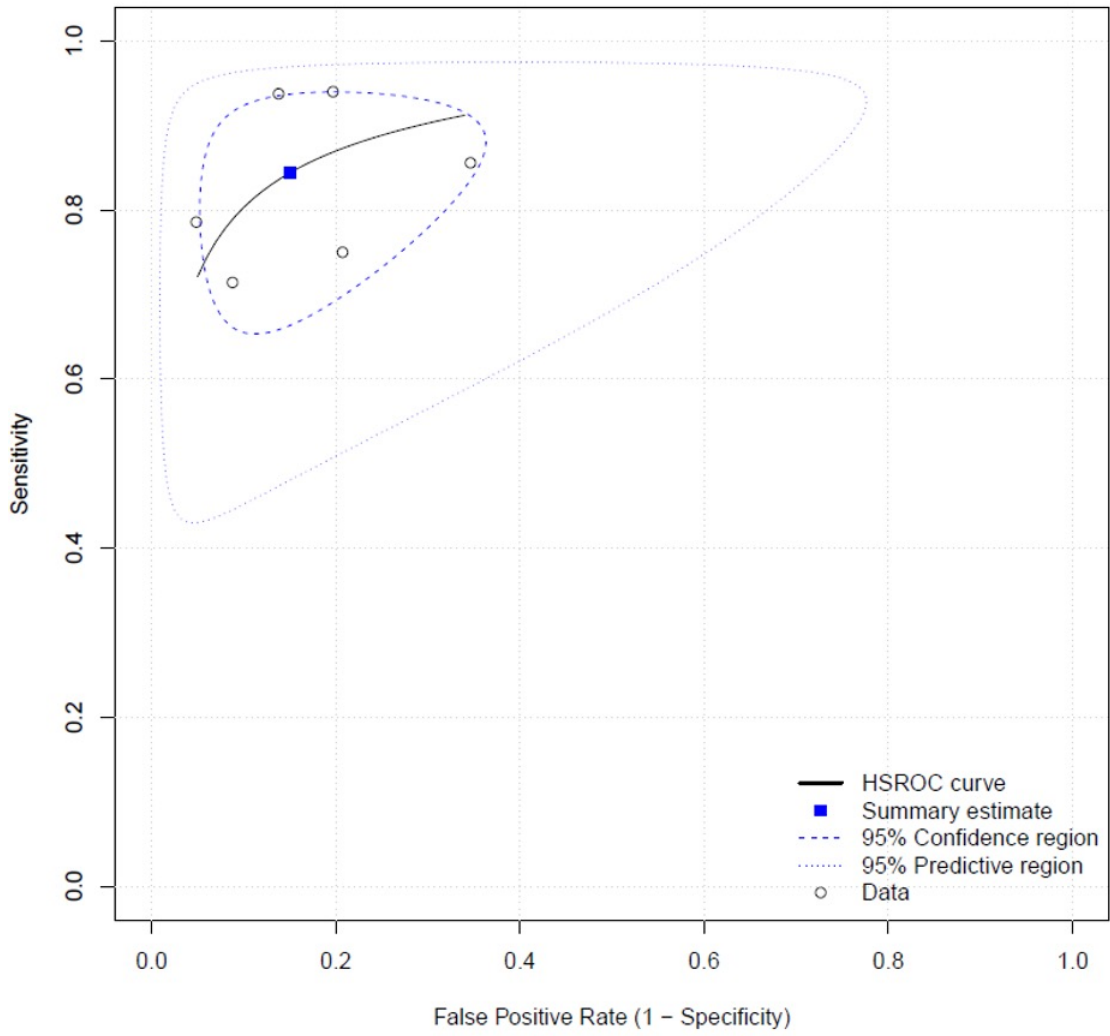

Supplement: bmjophth-2021-000915supp008.pdf [file bmjophth-2021-000915supp008.pdf]
