# Supplementary figures and images for: Diagnostic accuracy of teleretinal screening for detection of diabetic retinopathy and age-related macular degeneration: a systematic review and meta-analysis
Source: HighWire-hosted journal article supplement (doi:10.1136/bmjophth-2021-000915), 2022-02-01

Forest plot of specificity

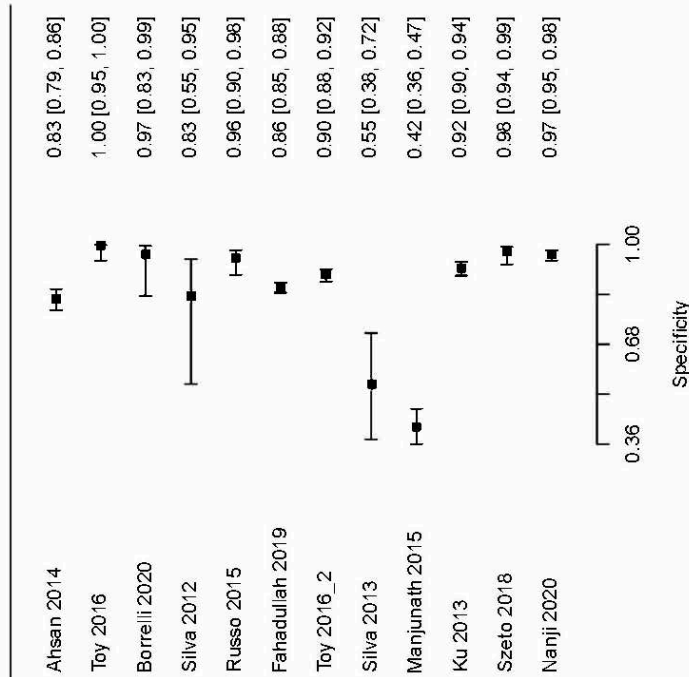

Forest plot of sensitivity

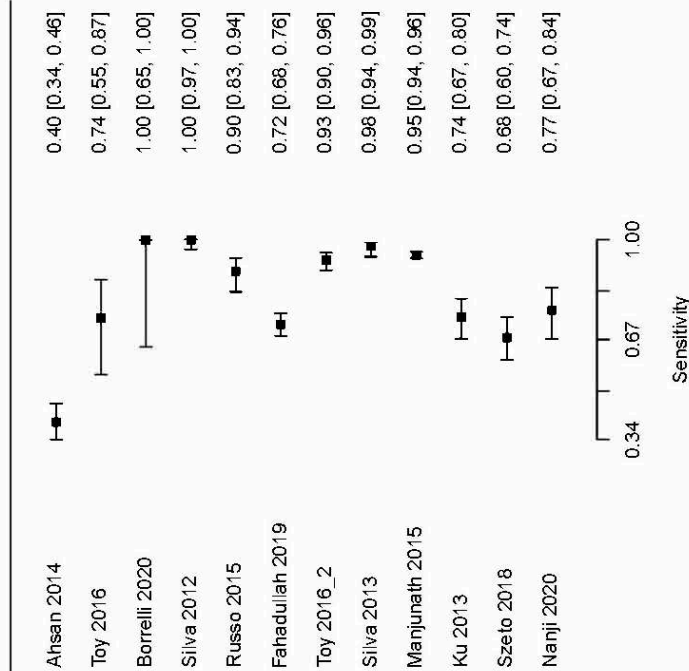

Supplement: bmjophth-2021-000915supp009_data_supplement.pdf [file bmjophth-2021-000915supp009_data_supplement.pdf]

Forest plot of specificity

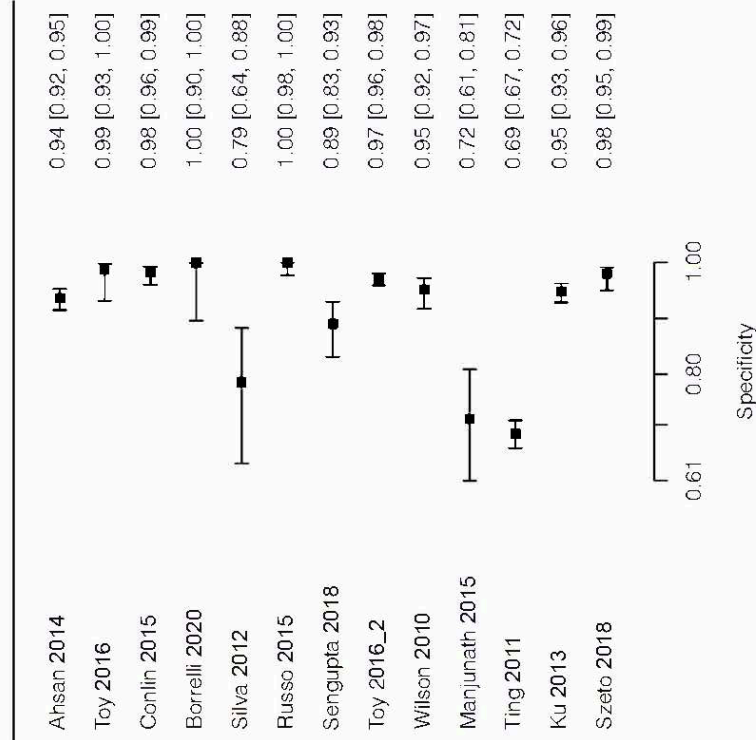

Forest plot of sensitivity

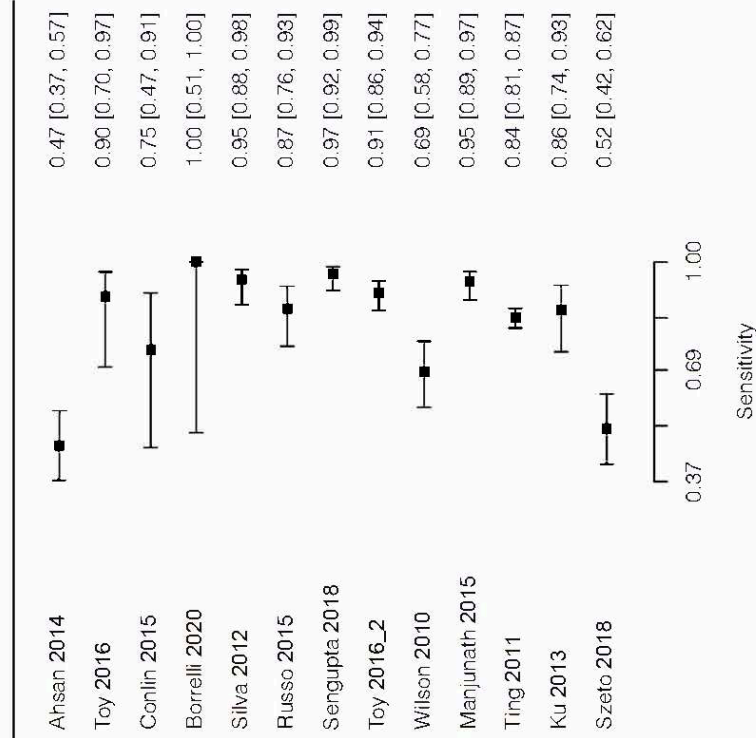

Supplement: bmjophth-2021-000915supp010_data_supplement.pdf [file bmjophth-2021-000915supp010_data_supplement.pdf]
